# Supplementary material for: Bispecific BCMA-CD3 Antibodies Block Multiple Myeloma Tumor Growth
Source: MDPI journal article supplement (doi:10.3390/cancers14102518), 2022-05-20
Supplement: s1 [file s1]

# Supplementary Material

**Table S1. Amino-acid sequence of BCMA-CD3 antibodies used in the study.**

|           | PBM0012                                                                                                                                                                                                                                                                                                                                                                                                                                                                                                                                                                                                                                                                                                                                                 |
|-----------|---------------------------------------------------------------------------------------------------------------------------------------------------------------------------------------------------------------------------------------------------------------------------------------------------------------------------------------------------------------------------------------------------------------------------------------------------------------------------------------------------------------------------------------------------------------------------------------------------------------------------------------------------------------------------------------------------------------------------------------------------------|
| Subunit 1 | DVVMQTQSPAFLSVTPGEKVTITCRASQSIDYLHWYQQKPDQAPKLLIKYASQSIGVPSRFSGS<br>GSGTDFTFITISLEAEDAATYYCQNGHSFPPTFGGGTKVEIKRTVAAPSVFIFPPSDEQLKSGTAS<br>VVCLLNNFYPREAKVQWKVDNALQSGNSQESVTEQDSKDYSLSSSTLTLSKADYEKHKVYA<br>CEVTHQGLSSPVTKSFNRGEC                                                                                                                                                                                                                                                                                                                                                                                                                                                                                                                        |
| Subunit 2 | QAVVTQEPSLTVSPGGTVTLTCGSSTGAVTTSNYANWVQEKPGQAF<br>RGLIGGTNKRAPGTPARFSGSLLGGKAALTLSGAQPEDEAEYYCAL<br>WYSNLWVFGGGTKLTVLSSASTKGPSVFPLAPSSKSTSGGTAALGC<br>LVKDYFPEPVTVSWNSGALTSGVHTFPAVLQSSGLYSLSSVVTVPSS<br>SLGTQTYICNVNHKPSNTKVDKKVEPKSC                                                                                                                                                                                                                                                                                                                                                                                                                                                                                                                  |
| Subunit 3 | QVQLVQSGAEVKKPGSSVKVSKASGYTFTSYVMHWVRQAPGQGLEWMGYIIPYNDATKYN<br>EKFKGRVTITADKSTSTAYMELSSLRSEDAVYYCARYNYDGYFDVWGQGLTVTVSSSTKGPSV<br>FPLAPSSKSTSGGTAALGCLVKDYFPEPVTVSWNSGALTSGVHTFPAVLQSSGLYSLSSVVTVP<br>SSLGTQTYICNVNHKPSNTKVDKKVEPKSCDGGGSGGGGSEVQLLESGLLVQPGGSLRLS<br>CAASGFTFTSYAMNWVRQAPGKGLEWVSRIRSKYNNYATYYADSVKGRFTISRDDSKNTLYL<br>QMNSLRAEDTAVYYCVRHGNFGNSYVSWFAYWGQGLTVTVSSASVAAPSVFIFPPSDEQLKS<br>GTASVVCLLNNFYPREAKVQWKVDNALQSGNSQESVTEQDSKDYSLSSSTLTLSKADYEK<br>KVYACEVTHQGLSSPVTKSFNRGECDKHTHTCPPCPAPEAAGGPSVFLFPPKPKDTLMISRTPEV<br>TCVVVDVSHEDPEVKFNWYVDGVEVHNAKTKPREEQYNSTYRVVSVLTVLHQDWLNGKEY<br>KCKVSNKALGAPIEKTISKAKGQPREPQVYTLPPCRDELTKNQVSLWCLVKGFYPSDIAVEWE<br>SNGQPENNYKTTTPVLDSDGSFFLYSKLTVDKSRWQQGNVFSCSVMHEALHNHYTQKSLSL<br>PGK |
| Subunit 4 | QVQLVQSGAEVKKPGSSVKVSKASGYTFTSYVMHWVRQAPGQGLEWMGYIIPYNDATKYN<br>EKFKGRVTITADKSTSTAYMELSSLRSEDAVYYCARYNYDGYFDVWGQGLTVTVSSSTKGPSV<br>FPLAPSSKSTSGGTAALGCLVKDYFPEPVTVSWNSGALTSGVHTFPAVLQSSGLYSLSSVVTVP<br>SSLGTQTYICNVNHKPSNTKVDKKVEPKSCDKHTHTCPPCPAPEAAGGPSVFLFPPKPKDTLMIS<br>RTPEVTCVVVDVSHEDPEVKFNWYVDGVEVHNAKTKPREEQYNSTYRVVSVLTVLHQDWL<br>NGKEYKCKVSNKALGAPIEKTISKAKGQPREPQVCTLPPSRDELTKNQVSLSCAVKGFYPSDIA<br>VEWESNGQPENNYKTTTPVLDSDGSFFLVSKLTVDKSRWQQGNVFSCSVMHEALHNHYTQK<br>SLSLSPGK                                                                                                                                                                                                                                                               |
|           | PBM0056                                                                                                                                                                                                                                                                                                                                                                                                                                                                                                                                                                                                                                                                                                                                                 |
| Subunit 1 | DVVMQTQSPAFLSVTPGEKVTITCRASQSIDYLHWYQQKPDQAPKLLIKYASQSIGVPSRFSGS<br>GSGTDFTFITISLEAEDAATYYCQNGHSFPPTFGGGTKVEIKRTVAAPSVFIFPPSDEQLKSGTAS<br>VVCLLNNFYPREAKVQWKVDNALQSGNSQESVTEQDSKDYSLSSSTLTLSKADYEKHKVYA<br>CEVTHQGLSSPVTKSFNRGEC                                                                                                                                                                                                                                                                                                                                                                                                                                                                                                                        |
| Subunit 2 | QAVVTQEPSLTVSPGGTVTLTCGSSTGAVTTSNYANWVQEKPGQAF<br>RGLIGGTNKRAPGTPARFSGSLLGGKAALTLSGAQPEDEAEYYCAL<br>WYSNLWVFGGGTKLTVLSSASTKGPSVFPLAPSSKSTSGGTAALGC<br>LVKDYFPEPVTVSWNSGALTSGVHTFPAVLQSSGLYSLSSVVTVPSS<br>SLGTQTYICNVNHKPSNTKVDKKVEPKSC                                                                                                                                                                                                                                                                                                                                                                                                                                                                                                                  |
| Subunit 3 | EVQLLESGLLVQPGGSLRLSCAASGFTFTSYAMNWVRQAPGKGLEWVSRIRSKYNNYATYY<br>ADSVKGRFTISRDDSKNTLYLQMNSLRAEDTAVYYCVRHGNFGNSYVSWFAYWGQGLTVTV<br>SSASVAAPSVFIFPPSDEQLKSGTASVVCLLNNFYPREAKVQWKVDNALQSGNSQESVTEQDS                                                                                                                                                                                                                                                                                                                                                                                                                                                                                                                                                       |

|           |                                                                                                                                                                                                                                                                                                                                                                                                                                                                                                                                              |
|-----------|----------------------------------------------------------------------------------------------------------------------------------------------------------------------------------------------------------------------------------------------------------------------------------------------------------------------------------------------------------------------------------------------------------------------------------------------------------------------------------------------------------------------------------------------|
|           | KDSTYLSSTLTLSKADYEKHKVYACEVTHQGLSSPVTKSFNRGECDKTHTCPPCPAPEAAGG<br>PSVFLFPPKPKDTLMISRTPEVTCVVVDVSHEDPEVKFNWYVDGVEVHNAKTKPREEQYNSTY<br>RVVSVLTVLHQDWLNGKEYKCKVSNKALGAPIEKTISKAKGQPREPQVYTLPPCRDELTKNQ<br>VSLWCLVKGFYPSDIAVEWESNGQPENNYKTTTPVLDSGGSFFLYSKLTVDKSRWQQGNVFS<br>CSVMHEALHNHYTQKSLSLSPGK                                                                                                                                                                                                                                             |
| Subunit 4 | QVQLVQSGAEVKKPGSSVKVSCKASGYFTSYVMHWVRQAPGQGLEWMGYIIPYNDATKYN<br>EKFKGRVTITADKSTSTAYMELSSLRSEDTAVYYCARYNYDGYFDVWGQGLTVTVSSTKGPSV<br>FPLAPSSKSTSGGTAALGCLVKDYFPEPVTVSWNSGALTSGVHTFPAVLQSSGLYSLSSVTVPS<br>SSLGTQTYICNVNHKPSNTKVDKKVEPKSCDKTHTCPPCPAPEAAGGPSVFLFPPKPKDTLMIS<br>RTPEVTCVVVDVSHEDPEVKFNWYVDGVEVHNAKTKPREEQYNSTYRVVSVLTVLHQDWL<br>NGKEYKCKVSNKALGAPIEKTISKAKGQPREPQVCTLPPSRDELTKNQVSLSCAVKGFYPSDIA<br>VEWESNGQPENNYKTTTPVLDSGGSFFLVSKLTVDKSRWQQGNVFSCSVMHEALHNHYTQK<br>SLSLSPGK                                                     |
|           | PBM0060                                                                                                                                                                                                                                                                                                                                                                                                                                                                                                                                      |
| Subunit 1 | QVQLVQSGAEVKKPGSSVKVSCKASGYFTSYVMHWVRQAPGQGLEWMGYIIPYNDATKYN<br>EKFKGRVTITADKSTSTAYMELSSLRSEDTAVYYCARYNYDGYFDVWGQGLTVTVSSASTKGP<br>SVFPLAPSSKSTSGGTAALGCLVKDYFPEPVTVSWNSGALTSGVHTFPAVLQSSGLYSLSSVTV<br>PSSSLGTQTYICNVNHKPSNTKVDKKVEPKSCDKTHTCPPCPAPEAAGGPSVFLFPPKPKDTL<br>MISRTPEVTCVVVDVSHEDPEVKFNWYVDGVEVHNAKTKPREEQYNSTYRVVSVLTVLHQD<br>WLNGKEYKCKVSNKALPAPIEKTISKAKGQPREPQVYTLPPCRDELTKNQVSLWCLVKGFYPS<br>DIAVEWESNGQPENNYKTTTPVLDSGGSFFLYSKLTVDKSRWQQGNVFSCSVMHEALHNHY<br>TQKSLSLSPGK                                                   |
| Subunit 2 | EVQLLESGGGLVQPGGSLRLSCAASGFTTFSTYAMNWVRQAPGKGLEWVSIRSKYNNYATYY<br>ADSVKGRFTISRDDSKNTLYLQMNSLRAEDTAVYYCVRHGNFGNSYVSWFAYWGQGLTVTV<br>SSGGGSGGGGSGGGGSAVVTQEPSLTVSPGGTVTLTCGSSTGAVTTSNYANWVQEKPQQA<br>FRGLIGGTNKRAPGTPARFSGSLLGGKAALTLGAQPEDEAEYYCALWYSNLWVFGGGTKLT<br>VLGGGSGGGGSGGGGSGGGGSAATHTCPPCPAPEAAGGPSVFLFPPKPKDTLMIS<br>RTPEVTCVVVDVSHEDPEVKFNWYVDGVEVHNAKTKPREEQYNSTYRVVSVLTVLHQDWL<br>NGKEYKCKVSNKALPAPIEKTISKAKGQPREPQVYTLPPSRDELTKNQVSLSCAVKGFYPSDIA<br>VEWESNGQPENNYKTTTPVLDSGGSFFLVSKLTVDKSRWQQGNVFSCSVMHEALHNHYTQK<br>SLSLSPGK |
| Subunit 3 | DVVMTQSPAFLSVTPGEKVTITCRASQSIDYLHWYQQKPDQAPKLLIKYASQSIGVPSRFSGS<br>GSGTDFTFITISLEAEDAATYYCQNGHSFPPTFGGGTKVEIKRTVAAPSVFIFPPSDEQLKSGTAS<br>VVCLLNNFYPREAKVQWKVDNALQSGNSQESVTEQDSKDSTYLSSTLTLSKADYEKHKVYA<br>CEVTHQGLSSPVTKSFNRGEC                                                                                                                                                                                                                                                                                                              |
|           | PBM0055                                                                                                                                                                                                                                                                                                                                                                                                                                                                                                                                      |
| Subunit 1 | QVQLVQSGAEVKKPGSSVKVSCKASGYFTSYVMHWVRQAPGQGLEWMGYIIPYNDATKYN<br>EKFKGRVTITADKSTSTAYMELSSLRSEDTAVYYCARYNYDGYFDVWGQGLTVTVSSASTKGP<br>SVFPLAPSSKSTSGGTAALGCLVKDYFPEPVTVSWNSGALTSGVHTFPAVLQSSGLYSLSSVTV<br>PSSSLGTQTYICNVNHKPSNTKVDKKVEPKSCDKTHTCPPCPAPEAAGGPSVFLFPPKPKDTL<br>MISRTPEVTCVVVDVSHEDPEVKFNWYVDGVEVHNAKTKPREEQYNSTYRVVSVLTVLHQD                                                                                                                                                                                                      |

|           |                                                                                                                                                                                                                                                                                                                                                                                                                                                                                                                                                                                                                |
|-----------|----------------------------------------------------------------------------------------------------------------------------------------------------------------------------------------------------------------------------------------------------------------------------------------------------------------------------------------------------------------------------------------------------------------------------------------------------------------------------------------------------------------------------------------------------------------------------------------------------------------|
|           | <p>WLNKEYCKVSNKALPAIEKTISKAKGQPREPQVYTLPPCRDELTKNQVSLWCLVKGFYPS</p> <p>DIAVEWESNGQPENNYKTTPVLDSGDSFFLYSKLTVDKSRWQQGNVFSCSVMHEALHNHY</p> <p>TQKSLSLSPGK</p>                                                                                                                                                                                                                                                                                                                                                                                                                                                     |
| Subunit 2 | <p>EVQLVESGGGLVQPGGSLKLSCAASGFTFNKYAMNWVRQAPGKGLEWVARIRSKYNNYATY</p> <p>YADSVKDRFTISRDDSKNTAYLQMNNLKTEDTAVYYCVRHGNFGNSYISYWAYWGQGLVT</p> <p>VSSGGGSGGGGSGGGGSQTIVTQEPSLTVSPGGTVTLTCSSTGAVTSGNYPNWVQQKPGQ</p> <p>APRGLIGGTFKFLAPGTPARFSGSLLGGKAALTLSGVQPEDEAEYYCVLWYSNRWVFGGGTKL</p> <p>TVLGGGSGGGGSGGGGSGGGGSGGGGSAATHCPPCPAPEAAGGPSVFLFPPKPKDTLMI</p> <p>SRTPEVTCVVVDVSHEDPEVKFNWYVDGVEVHNAKTKPREEQYNSTYRVVSVLTVLHQDWL</p> <p>NGKEYCKVSNKALPAIEKTISKAKGQPREPQVYTLPPSRDELTKNQVSLSCAVKGFYPSDIA</p> <p>VEWESNGQPENNYKTTPVLDSGDSFFLYSKLTVDKSRWQQGNVFSCSVMHEALHNHYTQK</p> <p>SLSLSPGK</p>                          |
| Subunit 3 | <p>DVVMVTQSPAFLSVTPGEKVTITCRASQISDYLHWYQQKPDQAPKLLIKYASQISGVPSPRFSGS</p> <p>SGGTDFTFITISLEAEDAATYYCQNGHSFPPTFGGGTKVEIKRTVAAPSVFIFPPSDEQLKSGTAS</p> <p>VVCLLNNFYPREAKVQWKVDNALQSGNSQESVTEQDSKDYSLSTLTLSKADYEKHKVYVA</p> <p>CEVTHQGLSPVTKSFNRGEC</p>                                                                                                                                                                                                                                                                                                                                                             |
|           | PBM0057                                                                                                                                                                                                                                                                                                                                                                                                                                                                                                                                                                                                        |
| Subunit 1 | <p>EVQLVESGGGLVQPGGSLRLSCAASGFTFSDYYMTWVRQAPGKGL</p> <p>EWVAF</p> <p>IRNRARGYTSDHNPSVKGRFTISRDNANKNSLYLQMNSLRAEDTAVY</p> <p>YCAR</p> <p>DRPSYYVLDYWGQGTTVTVSSASTKGPSVFPLAPCSRSTSESTAALG</p> <p>CLV</p> <p>KDYFPEPVTVSWNSGALTSGVHTFPAVLQSSGLYSLSSVTVTPSSNF</p> <p>GTQ</p> <p>TYTCNVDPKPSNTKVDKTVERKCRVRCPRCPAPPVAGPSVFLFPPK</p> <p>PKDT</p> <p>LMISRTPEVTCVVVAVSHEDPEVQFNWYVDGVEVHNAKTKPREEQ</p> <p>FNSTF</p> <p>RVVSVLTVVHQDWLNGKEYCKVSNKGLPSSIEKTISKTKGQPREP</p> <p>QVYT</p> <p>LPPSREEMTKNQVSLTCLVKGFYPSDIAVEWESNGQPENNYKTTPP</p> <p>MLDS</p> <p>DGSFFLYSRLTVDKSRWQQGNVFSCSVMHEALHNHYTQKSLSLSPG</p> <p>K</p> |
| Subunit 2 | <p>EVQLLES GGGLVQPGGSLRLSCAASGFTFSSYPMSWVRQAPGKGLE</p> <p>WVSA</p> <p>IGGSGGSLPYADIVKGRFTISRDN SKNTLYLQMNSLRAEDTAVYYC</p> <p>ARYW</p> <p>PMDIWGQGLTVTVSSASTKGPSVFPLAPCSRSTSESTAALGCLVKD</p> <p>YFPE</p> <p>PVTVSWNSGALTSGVHTFPAVLQSSGLYSLSSVTVTPSSNFGTQTYT</p> <p>CNV</p> <p>DHKPSNTKVDKTVERKCEVECPECPAPPVAGPSVFLFPPKPKDTLM</p> <p>ISRT</p> <p>PEVTCVVVAVSHEDPEVQFNWYVDGVEVHNAKTKPREEQFNSTFR</p> <p>VVSVL</p> <p>TVVHQDWLNGKEYCKVSNKGLPSSIEKTISKTKGQPREPQVYTL P</p> <p>PSRE</p>                                                                                                                                |

|           |                                                                                                                                                                                                                                                        |
|-----------|--------------------------------------------------------------------------------------------------------------------------------------------------------------------------------------------------------------------------------------------------------|
|           | EMTKNQVSLTCEVKGFYPSDIAVEWESNGQPENNYKTTPPMLDSD<br>GSFFL<br>YSKLTVDKSRWQQGNVFSCSVMHEALHNHYTQKSLSLSPGK                                                                                                                                                    |
| Subunit 3 | DIVMTQSPDSLAVSLGERATINCKSSQSLFNVRSRKNYLAWYQQKP<br>GQPP<br>KLLISWASTRESGVPDRFSGSGSGTDFTLTISSLQAEDVAVYYCKQS<br>YDL<br>FTFGSGTKLEIKRTVAAPSVFIFPPSDEQLKSGTASVVCLLNNFYPR<br>EAKVQWKVDNALQSGNSQESVTEQDSKDSTYLSSTLTLSKADYEK<br>HKVYACEVTHQGLSSPVTKSFNRGEC     |
| Subunit 4 | EIVLTQSPGTLSLSPGERATLSCRASQSVSSSYLAWYQQKPGQAPRL<br>LMY<br>DASIRATGIPDRFSGSGSGTDFTLTISRLEPEDFAVYYCQQYQSWPL<br>TFG<br>QGTKVEIKRTVAAPSVFIFPPSDEQLKSGTASVVCLLNNFYPR<br>EAKVQWK<br>VDNALQSGNSQESVTEQDSKDSTYLSSTLTLSKADYEKHKVYACE<br>VTHQ<br>GLSSPVTKSFNRGEC |

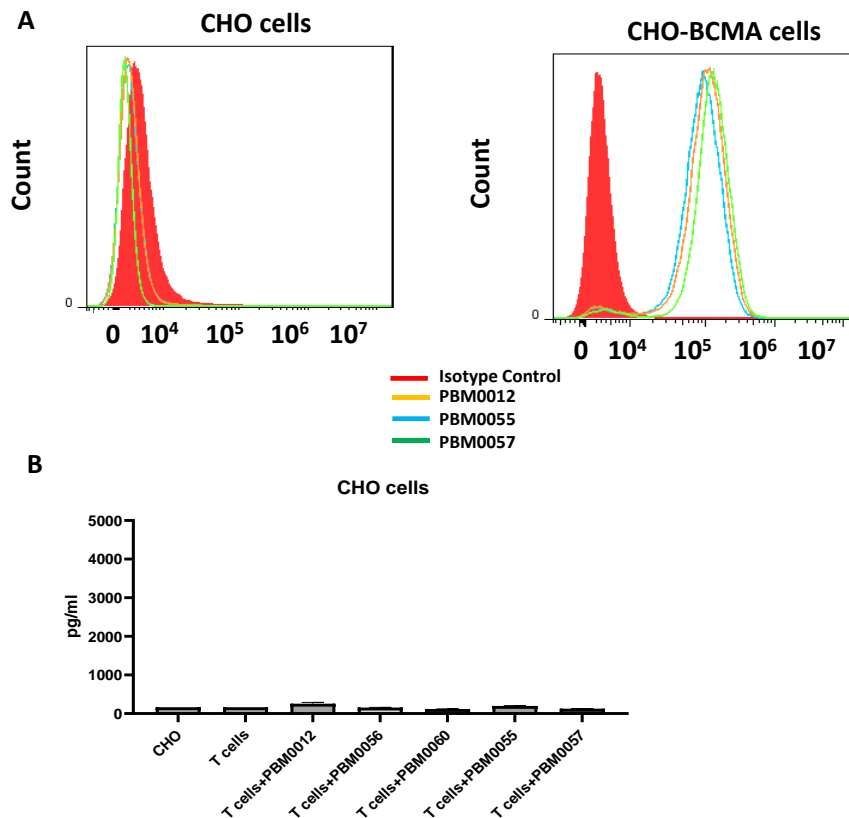

**Figure S1. (A)** FACS with BCMA-CD3 antibodies shows no binding with BCMA-negative CHO cells. CHO-BCMA cells show positive binding with BCMA-CD3 antibodies. Left panel FACS with CHO cells, right panel FACS with CHO-BCMA cells. Representative FACS with PBM0012, PBM0055 and PBM0057 BCMA-CD3 antibodies is shown. **(B)** IFN-gamma ELISA assay as described in Materials and Methods shows no secretion of IFN-gamma by T cells with BCMA-CD3 antibodies with CHO target cells. Bars show average  $\pm$  standard deviations.

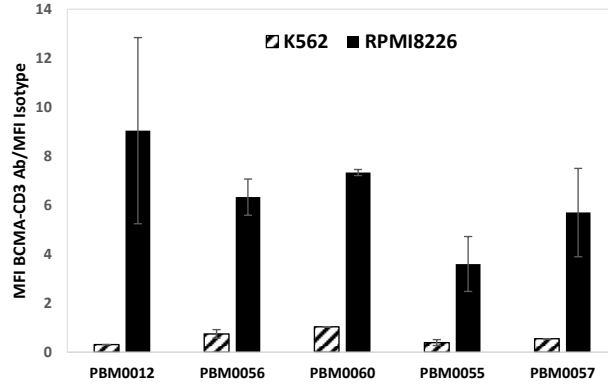

(A)

K562 cells

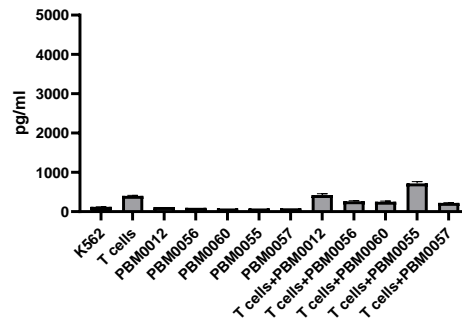

(B)

**Figure S2.** (A) FACS with BCMMA-CD3 antibodies shows no binding of BCMA-CD3 antibodies to K562 lymphoblast cells. Multiple myeloma RPMI8226 cells show positive binding with BCMA-CD3 antibodies. MFI BCMA Abs/MFI isotype antibody is shown on Y-axis. (B) T cells with BCMA-CD3 antibodies don't secrete high level IFN-gamma with K562 cells. IFN-gamma ELISA assay was performed as described in Materials and Methods. Bars show average  $\pm$  standard deviations.

A

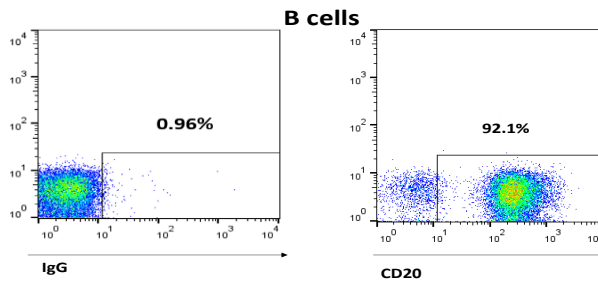

B

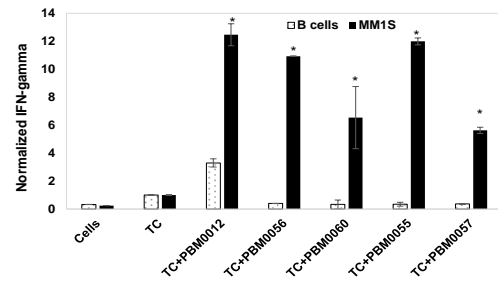

**Figure S3.** T cells with BCMA-CD3 antibodies secrete significantly less IFN-gamma with B cells than with MM1S multiple myeloma cells. (A) FACS with B cell marker, CD20 antibody shows >90% CD20-positive cells in expanded primary B cells. The binding was negative with BCMA-CD3 antibody (not shown). (B) Low level of IFN-gamma secreted by T cells and BCMA-CD3 antibodies with primary B cells. Bars show average  $\pm$  standard deviations. IFN-gamma is normalized to the level of IFN-gamma secreted by T cells (TC) alone with target cells. \*  $p < 0.05$ , IFN-gamma secreted by BCMA-CD3 antibodies with T cells with multiple myeloma MM1S target cells versus INF-gamma secreted with target B cells.

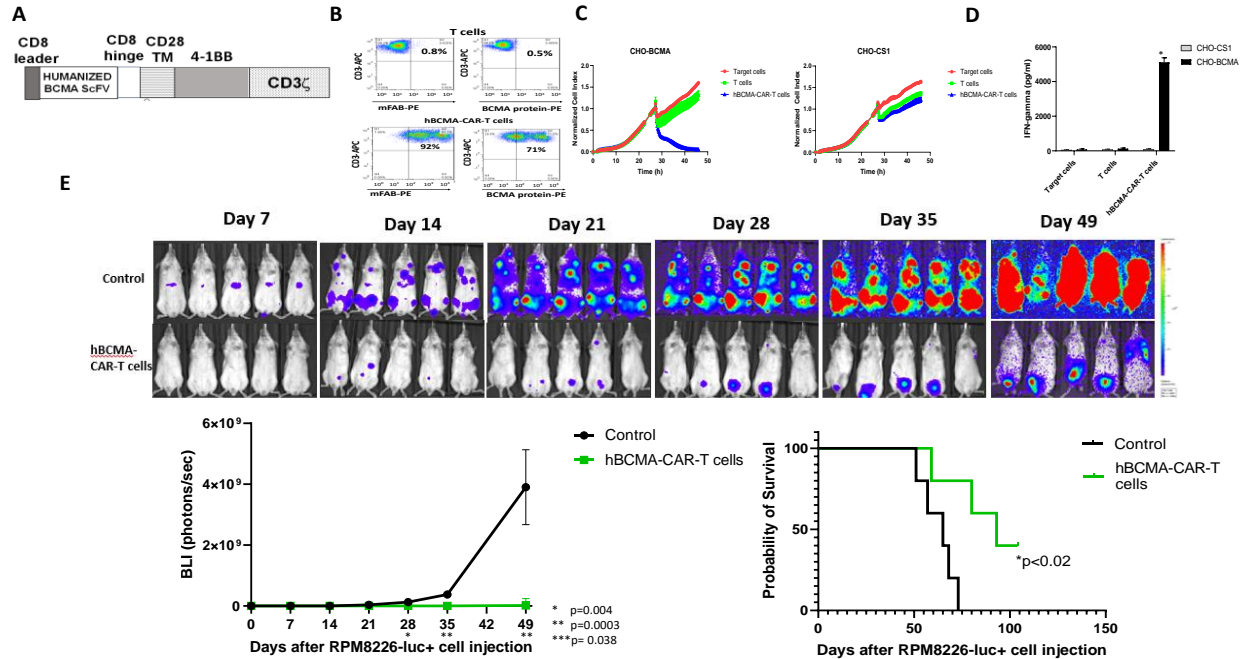

**Figure S4.** Humanized BCMA-CAR-T cells significantly block RPMI8226-luciferase+ multiple myeloma xenograft tumor growth. (A) The structure of humanized hBCMA-CAR construct. BCMA ScFv contains VH and VL (Table S1) linked with G4S linker. CAR structure contains CD8 alpha hinge, CD28 transmembrane, 4-1BB co-stimulatory and CD3 activation domains. (B) FACS detects CAR-positive T cells after transduction of T cells with hBCMA-CAR lentivirus. FACS was performed on BCMA-CAR-T cells with anti-mouse-F(ab)<sub>2</sub> antibody (left panel) and with recombinant BCMA protein (right panel). (C) hBCMA-CAR-T cells kill CHO-BCMA cells (left) and don't kill CHO-CS1 target cells (right). RTCA assay was performed as described in Materials and Methods. (D) hBCMA-CAR-T cells secrete high level of IFN-gamma with CHO-BCMA cells.  $p < 0.0004$ , Student's t-test. IFN-gamma secreted by hBCMA-CAR-T cells with CHO-BCMA cells compared with CHO-CS1 target cells. (E) hBCMA-CD3 CAR-T cells significantly decreased RPMI8226-luc<sup>+</sup> xenograft tumor growth. Upper panel shows imaging of BCMA-CAR-T cell-treated mice (n = 5 mice/group). Lower left panel shows quantification of imaging BLI (photons/sec). \*  $p < 0.004$ , BLI of BCMA-treated mice at day 28; \*\*  $p < 0.0003$  at day 35; \*\*\*  $p < 0.04$  at day 49 versus control group by Student's t-test. Lower right panel. BCMA-CAR-T cells significantly prolong survival of RPMI8226 xenograft NSG mice. \*  $p < 0.02$  of BCMA-CAR-T cell treated versus control mice by Log-rank Mantel-Cox test.
